# Supplementary material for: TERT Mutation Is Accompanied by Neutrophil Infiltration and Contributes to Poor Survival in Isocitrate Dehydrogenase Wild-Type Glioma
Source: Front Cell Dev Biol. 2021 Apr 30;9:654407. doi: 10.3389/fcell.2021.654407 (PMC8119999; doi:10.3389/fcell.2021.654407)
Supplement: Supplementary file 2 [file Table_1.XLSX]

## Sheet: Sheet1
ID	Gender	Age	Grade	IDH	TERT	Microglia	Macrophage-CD68	neutrophli	Tfh-CXCR5	Tcm-CD45RO	T cell-CD3	cyctotoxic T-CD8
1161	male	20	II	wt	WT	0.0493881	0.160152	0.194954	0.145572	0.218851	0.139828	0.184741
1018	female	24	II	wt	WT	0.0388634	0.142834	0.215951	0.173185	0.283107	0.167659	0.267722
1163	male	25	II	wt	WT	0.049824	0.138955	0.191272	0.133932	0.224871	0.163224	0.174439
1162	male	26	II	wt	WT	0.049824	0.141984	0.212961	0.139849	0.19843	0.159361	0.158528
1019	female	28	II	wt	WT	0.0388634	0.149367	0.207778	0.177137	0.291547	0.152625	0.273178
1269	male	29	II	wt	WT	0.0484738	0.154555	0.216369	0.179101	0.25206	0.157943	0.157911
1271	male	30	II	wt	WT	0.0440447	0.166669	0.242653	0.172573	0.225806	0.190241	0.171469
1020	female	33	II	wt	WT	0.0388634	0.162492	0.187789	0.190342	0.283318	0.15808	0.268459
1270	male	35	II	wt	WT	0.0480819	0.156602	0.227964	0.164431	0.239011	0.183019	0.168605
1691	male	40	III	wt	WT	0.0374663	0.21462	0.180227	0.183145	0.256947	0.180283	0.208619
1689	male	43	III	wt	WT	0.0406085	0.235437	0.200143	0.18621	0.239181	0.205477	0.214742
1690	male	46	III	wt	WT	0.036066	0.232886	0.182772	0.194312	0.247541	0.178396	0.246958
911	female	49	III	wt	WT	0.0414319	0.0865361	0.17849	0.166107	0.225903	0.171585	0.197468
1279	female	49	III	wt	WT	0.0538083	0.210486	0.198522	0.214551	0.243033	0.271996	0.238688
314	female	50	III	wt	WT	0.0538063	0.22055	0.240084	0.337154	0.247786	0.34674	0.221163
1305	female	52	III	wt	WT	0.0590745	0.210486	0.203793	0.214551	0.243033	0.271996	0.238688
315	female	54	III	wt	WT	0.0548803	0.22055	0.240084	0.337154	0.247786	0.34674	0.221163
912	female	54	III	wt	WT	0.0414319	0.0643526	0.176072	0.159933	0.217254	0.168692	0.169197
538	male	54	IV	wt	WT	0.0495629	0.141529		0.14737	0.26113	0.225183	0.161613
868	female	55	III	wt	WT	0.0465953	0.0715423	0.178382	0.168759	0.22055	0.191483	0.172686
1486	male	55	IV	wt	mut	0.0387338	0.174454	0.199693	0.160295	0.1929	0.191127	0.208354
1635	male	57	III	wt	mut	0.0494589	0.222242	0.289025	0.276698	0.249175	0.307242	0.196365
1306	female	57	III	wt	WT	0.0541281	0.210486	0.203829	0.214551	0.243033	0.271996	0.238688
1890	female	57	III	wt	WT	0.0432727	0.1531	0.269472	0.22171	0.216751	0.17406	0.189295
29	male	57	IV	wt	mut	0.0502986	0.230797	0.239994	0.307063	0.267175	0.262586	0.237449
1637	male	58	III	wt	mut	0.0481565	0.222242	0.31286	0.276698	0.249175	0.307242	0.196365
1745	female	58	III	wt	WT	0.0496765	0.226828	0.222466	0.180347	0.167032	0.175856	0.175065
1488	male	59	IV	wt	mut	0.0387338	0.164026	0.232154	0.151915	0.214233	0.189093	0.211185
1743	female	60	III	wt	WT	0.0496765	0.17518	0.202522	0.202594	0.179049	0.161597	0.180084
28	male	60	IV	wt	mut	0.0534679	0.230797	0.218376	0.307063	0.267175	0.262586	0.237449
316	female	61	III	wt	WT	0.0506692	0.22055	0.246037	0.337154	0.247786	0.34674	0.221163
546	male	61	IV	wt	WT	0.0495629	0.141529		0.183801	0.218944	0.225183	0.155984
1121	female	62	II	wt	mut	0.0411592	0.190971		0.154061	0.228014	0.157613	0.190676
1636	male	62	III	wt	mut	0.0528243	0.222242	0.257084	0.276698	0.249175	0.307242	0.196365
874	female	62	III	wt	WT	0.0414319		0.178382	0.168759	0.22055	0.172267	0.172686
27	male	62	IV	wt	mut	0.0543563	0.230797	0.22699	0.307063	0.267175	0.262586	0.237449
485	male	64	IV	wt	WT	0.0495629	0.156062		0.219117	0.196487	0.195584	0.237478
1834	male	64	IV	wt	WT		0.205096	0.202386	0.187303	0.193177	0.259207	0.193203
1744	female	66	III	wt	WT	0.0496765	0.217286	0.209271	0.179948	0.174094	0.159449	0.187413
486	male	66	IV	wt	WT	0.0495629	0.162952		0.230471	0.217731	0.201556	0.155984
492	male	66	IV	wt	WT	0.0495629	0.162952		0.150432	0.231949	0.201556	0.241196
1835	male	66	IV	wt	WT		0.205096	0.173701	0.187303	0.193177	0.259207	0.193203
1119	female	67	II	wt	mut	0.0506185	0.206923		0.148595	0.192978	0.145976	0.195838
1487	male	67	IV	wt	mut	0.0420021	0.169272	0.227465	0.168851	0.190238	0.181564	0.21795
1836	male	67	IV	wt	WT		0.205096	0.190322	0.187303	0.193177	0.259207	0.193203
1888	female	68	III	wt	WT	0.0432727	0.155031	0.243777	0.229062	0.218274	0.163842	0.236237
1120	female	69	II	wt	mut	0.0412736	0.164409		0.160694	0.191738	0.153627	0.215765
491	male	70	IV	wt	WT	0.0495629	0.156062		0.157576	0.265281	0.195584	0.161678
1889	female	72	III	wt	WT	0.0432727	0.158022	0.258241	0.214836	0.201678	0.18094	0.208224
